# Supplementary material for: Characterization of Chenopodin Isoforms from Quinoa Seeds and Assessment of Their Potential Anti-Inflammatory Activity in Caco-2 Cells
Source: MDPI journal article supplement (doi:10.3390/biom10050795), 2020-05-21

**Supplementary Figure S3.** IL-8 relative expression in Caco-2 cells incubated with LcC or HcC (1.0 mg/mL) under different experimental conditions. Response to IL-1 $\beta$  alone was set as 100%.

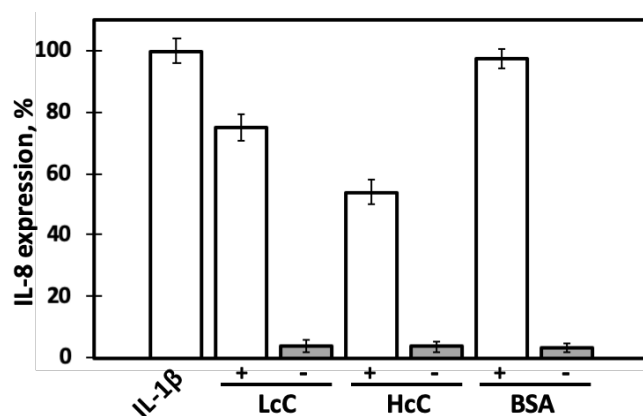

Supplement: s1 [file s1]
