# Supplementary material for: Characterization of Chenopodin Isoforms from Quinoa Seeds and Assessment of Their Potential Anti-Inflammatory Activity in Caco-2 Cells
Source: MDPI journal article supplement (doi:10.3390/biom10050795), 2020-05-21
Supplement: s1 [file s1]

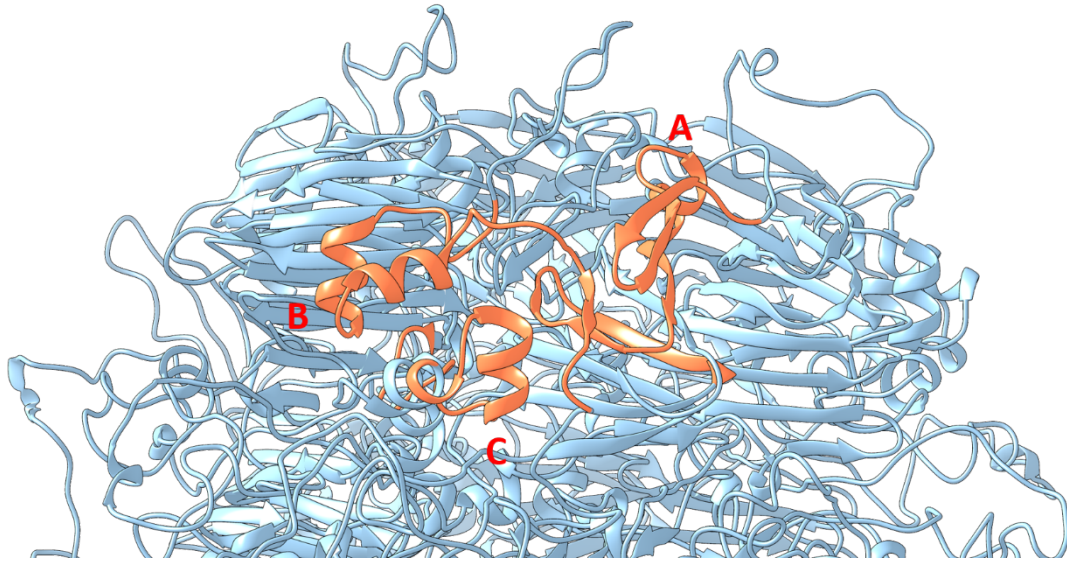

**Supplementary Figure S4.** Magnification of the predictive 3D structure of the homo-hexamer AAS67036 chenopodin (HcC), showing the regions with the highest homology with IL-1RA. Regions A, B and C are represented in coral, to show their spatial closeness. Sequences A and B belong to one monomer, whereas sequence C are part of an adjacent monomer.
