# Supplementary material for: Characterization of Chenopodin Isoforms from Quinoa Seeds and Assessment of Their Potential Anti-Inflammatory Activity in Caco-2 Cells
Source: MDPI journal article supplement (doi:10.3390/biom10050795), 2020-05-21

**Supplementary Figure S1:** Mono-dimensional (A) and bi-dimensional (B) electrophoretic separations of LcC and HcC chenopodin fractions

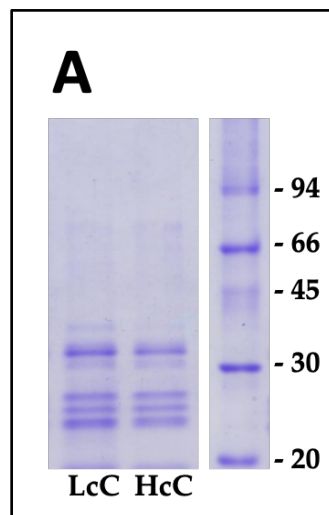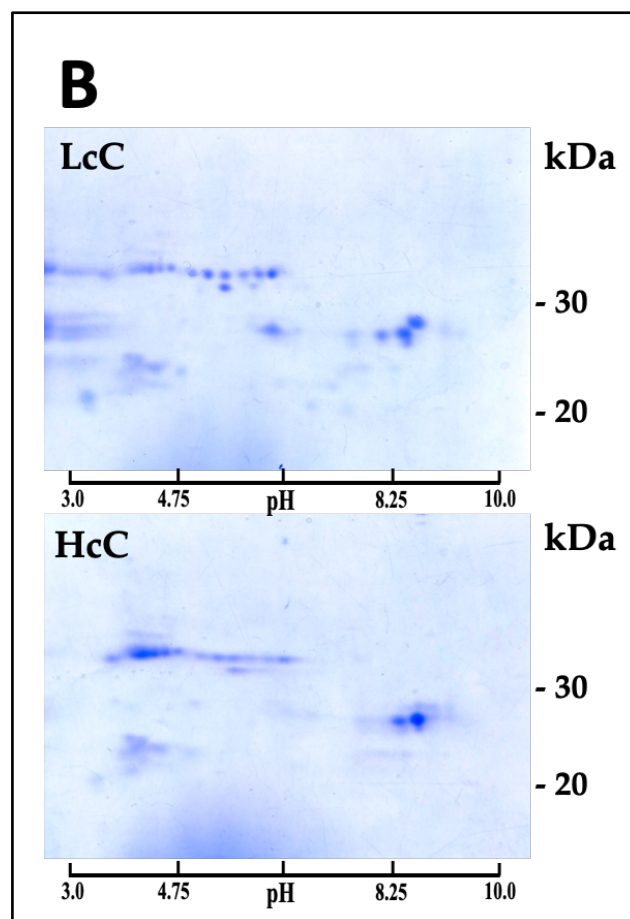

Supplement: s1 [file s1]
