# Supplementary material for: Characterization of Chenopodin Isoforms from Quinoa Seeds and Assessment of Their Potential Anti-Inflammatory Activity in Caco-2 Cells
Source: MDPI journal article supplement (doi:10.3390/biom10050795), 2020-05-21

**Supplementary Figure S2.** Assessment of Caco-2 cell vitality following treatment with LcC and HcC. 3-[4-dimethylthiazol-2-yl]-2,5-diphenyltetrazolium bromide (MTT) method (white bars) and cell counting upon staining with Trypan Blue (gray bars) have been used. LcC and HcC were both used at 0.5 mg/mL and 1.0 mg/mL (final concentration). Caco-2 cells used as the control were incubated without protein addition (0 mg/mL). Determinations have been carried out in triplicate according to ref. 43. Data are expressed as a percentage of the control sample.

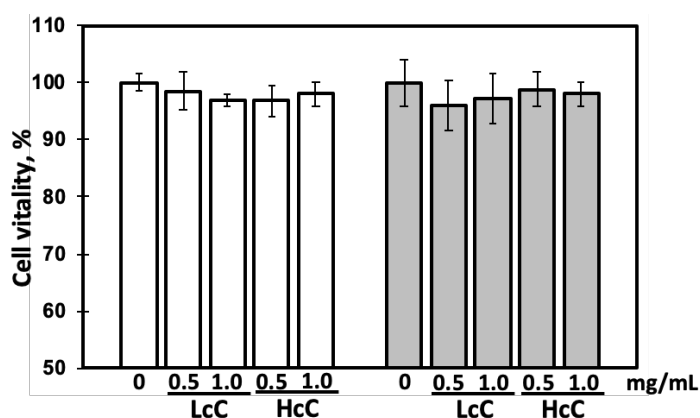

Supplement: s1 [file s1]
