# Supplementary material for: Characterization of Chenopodin Isoforms from Quinoa Seeds and Assessment of Their Potential Anti-Inflammatory Activity in Caco-2 Cells
Source: Biomolecules. 2020 May 21;10(5):795. doi: 10.3390/biom10050795 (PMC7277664; doi:10.3390/biom10050795)
Supplement: Supplementary file 1 [file biomolecules-10-00795-s001.zip]

Archive with 10 entries (10 files):
- Supplementary Figure S1.pdf
- __MACOSX/._Supplementary Figure S1.pdf
- Supplementary Figure S2.pdf
- __MACOSX/._Supplementary Figure S2.pdf
- Supplementary Figure S3.pdf
- __MACOSX/._Supplementary Figure S3.pdf
- Supplementary Figure S4.pdf
- __MACOSX/._Supplementary Figure S4.pdf
- Supplementary Table S1.xlsx
- __MACOSX/._Supplementary Table S1.xlsx
