# Supplementary material for: Characterization of Chenopodin Isoforms from Quinoa Seeds and Assessment of Their Potential Anti-Inflammatory Activity in Caco-2 Cells
Source: Biomolecules. 2020 May 21;10(5):795. doi: 10.3390/biom10050795 (PMC7277664; doi:10.3390/biom10050795)
Supplement: Supplementary file 1 [file biomolecules-10-00795-s001.zip › Supplementary Table S1.xlsx]

## Sheet: Band A
Family	Member	Database	Accession	Score	Mass	Num. of matches	Num. of significant matches	Num. of sequences	Num. of significant sequences	emPAI	Description	Sequence
1	1	NCBI_ChenopodiumQuinoa	ABI94736.1	666	53942	13	12	9	8	0.65	ABI94736.1 11S seed storage globulin B [Chenopodium quinoa]	MAKSTTTLFLLSCSIALVLLNGCMGQGRMREMQGNECQIDRLTALEPTHRIQAEGGLTEVWDTQDQQFQCSGVSVIRRTIEPNGLLLPSFTSGPELIYIEQGNGISGLMIPGCPETFESMSQESWREGMERGMRGGRFQDQHQKIRHLRQGHIFAMPAGVAHWAYNSGNEPLVAVILIDTSNHANQLDKDYPKRFYLAGKPQQEHSRHHHRGGESQRGEHGSDGNVFSGLDTKSVAQSFGVSEDIAEKLQAKQDERGNIVLVQEGLHVIKPPSSRSYDDEREQRHRSPRSNGLEETICSARLSENIDDPSKADVYSPEAGRLTTLNSFNLPILSNLRLSAEKGVLYRNAIMAPHYNLNAHSIIYGVRGRGRIQIVNAQGNSVFDDELRQGQLVVVPQNF…
1	2	NCBI_ChenopodiumQuinoa	AAS67036.1	639	54007	15	14	9	8	0.65	AAS67036.1 11S seed storage globulin [Chenopodium quinoa]	MAKSTTTLFLLSCSIALVLLNGCMGQGRMREMQGNECQIDRLTALEPTNRIQAEGGLTEVWDTQDQQFQCSGVSVIRRTIEPNGLLLPSFTSGPELIYIEQGNGISGLMIPGCPETFESMSQESWREGMKRGMRGGRFQDQHQKIRHLRQGHIFAMPAGVAHWAYNTGNEPLVAVILIDTSNHANQLDKDYPKRFYLAGKPQQEHSRHQHRGGESQRGERGSGGNVFSGLGTKTIAQSFGVSEDIAEKLQAEQDERGNIVLVQEGLHVIKPPSSRSYDDEREQRRHRSPRSNGLEETICSARLSENIDEPSKADVYSPEAGRLTTLNSFNLPILSNLRLSAEKGVLYRNAIMAPHYNLNAHSIIYGVRGRGRIQIVNAQGNSVFDDELRQGQLVVVPQN…
2	1	NCBI_ChenopodiumQuinoa	XP_021768838.1	637	52806	15	15	8	8	0.67	XP_021768838.1 11S globulin seed storage protein 2-like [Chenopodium quinoa]	MGGTKILVALSLCLMVSSALGQGSHKRLSYQAQQCRINRLTSSEPNQRIECEGGLIELWDETEEQFQCSGIHAMRVTVQQNSLSLPNFHPFPRLVYIERGEGILGVTFPGCPETYDSSGRQEERIRGDEQREFGQQKDLHQKVHRFTRGDIIAIPPGAVHWCYNDGNEEVVTVIVNDLNNPSNQLDQTFRSFYLAGGLEKSSEIRGKINNIFRPFAPELLSEAFDVPEDLIRKMQQTENRGLIIRVDKGEMRILSPGSEQDYDDERRRKYVGLDVNGLEETICTMRLRHNLDNRREADVYSRHGGRLNIVNEHKLPILRHLDMSVEKGNMFPNTIYSPHWAVNSHSVVYVTRGEAHIQVVGNNGESVMDDRVNEGEMFVIPQYFTVSVKAGSNGFEYVS…
3	1	NCBI_ChenopodiumQuinoa	XP_021752668.1	302	61191	8	8	6	6	0.4	XP_021752668.1 13S globulin seed storage protein 2-like [Chenopodium quinoa]	MSRVFLLPLALTLLILSPTSLAQLGFQLGQSPFLPSGQSSPQHSRLQRGQQALNDCQINQLSANEPSIRIQAEAGITEVWDPKEQQEFQCAGVTVIRREIEPKGLLLPHYNNAPSISYVIRGRGLLGLSSLGCADTYESGSPEFFSEESRRSERFEESRRSERGSEEMRDQHQKVRRFHKGHVIGLPAGVSKWVYNDGEDRLTIVTLYDTNNFQNQLDDNLRSFFLAGNPQGRGGDQSGRQHESSRRHTRGGQEEMGQNILSGFDKQLLADAFEVESDTISKIQGENDDRGAIIRVESGELEMLIPEWDQEEQRSERHHRGGGSERSEEEERSERHHRGGRGRQSESSRPHNGIEQTLCSARLSVNIDNPERADVFNPQGGRLTNINSNKLPILNYLRL…
4	1	NCBI_ChenopodiumQuinoa	XP_021764389.1	193	65329	6	6	6	6	0.37	XP_021764389.1 vicilin-like antimicrobial peptides 2-2 [Chenopodium quinoa]	MGLLKGKVSVILLVFSLLVVLCASLSVSKEDQQLRLCKEHCRQQRQLDSRQRHQCETACEEYIREKERREQRDEPQSRHDPGKEYRECRQRCQEEKEGKRQEQVCESECEQRKIEQEREIRRRRDEDDEIVGRKKERSEDEEEEEEESSGKGRPYVFDDQHWSTKLKAEEGRVRVLQKFTKRSKLFKGIENFRVLIFEANPQTFVVPNHW DADVVLFVAQGKGTVSLVYTDRRESFNIERGHVMVIPAGVTAYLINRGNNDKLILVKLINPVSNIGKFESFFGPGGDNPESYFNAFSSDILQAAFKTSEDSLKRIFSQQREGAIIKASEEQIRALTHEKGSHWPFGGKGSRGSGPFHLLRQNPRESNDFGSLFEVDSNDYRQLRDLNVAVAFANITQG…

## Sheet: Band B
Family	Member	Database	Accession	Score	Mass	Num. of matches	Num. of significant matches	Num. of sequences	Num. of significant sequences	emPAI	Description	Sequence
1	1	NCBI_ChenopodiumQuinoa	XP_021752668.1	2171	61191	60	58	19	18	1.71	XP_021752668.1 13S globulin seed storage protein 2-like [Chenopodium quinoa]
2	1	NCBI_ChenopodiumQuinoa	XP_021764389.1	453	65329	16	15	10	9	0.59	XP_021764389.1 vicilin-like antimicrobial peptides 2-2 [Chenopodium quinoa]
2	2	NCBI_ChenopodiumQuinoa	XP_021762713.1	405	64522	13	13	7	7	0.44	XP_021762713.1 vicilin-like antimicrobial peptides 2-1 [Chenopodium quinoa]	MGLLKGKVSVILLVFSLLVVLCASLSVSKEDQQLRLCKEHCRQQRQLDSRQRHQCETACEEYIREKERREQRDEPQSRHDPGKEYSKCRQRCQEEEGRRQEQVCESECEQRKIEQEREIRRRRDEDDEIVGRKRSEDEEEEEEESSGKGRPYVFDDQHWSTKLKAEEGRVRVLQKFTKRSKLFKGIENFRVMIFEANPQTFVVPNHWDADVVLFVAQGEGTVSLVYTDRRESFNIERGHVMVIPAGVTAYLINKGNNDKLILVKLINPVSNIGKFESFFGPGGDNPESYFNAFSSDILEAAFKTSEDSLKRIFSQQREGAIIRASEEQIKALTHEKGSHWPFGGKGSRDSAPFHLLRQNPRESNDFGSLFEVDSNDYRQLRDLNVAVSFANITQGSMHT…
3	1	NCBI_ChenopodiumQuinoa	XP_021768838.1	317	52806	9	9	7	7	0.56	XP_021768838.1 11S globulin seed storage protein 2-like [Chenopodium quinoa]
4	1	NCBI_ChenopodiumQuinoa	ABI94736.1	296	53942	10	9	9	8	0.65	ABI94736.1 11S seed storage globulin B [Chenopodium quinoa]
4	2	NCBI_ChenopodiumQuinoa	AAS67036.1	188	54007	7	6	7	6	0.45	AAS67036.1 11S seed storage globulin [Chenopodium quinoa]
5	1	NCBI_ChenopodiumQuinoa	XP_021746146.1	112	62487	3	3	3	3	0.18	XP_021746146.1 vicilin-like seed storage protein At2g28490 [Chenopodium quinoa]	MGSLKGILLVALIVCYSMQVVVSQYDHEEERRAKEEDWKRREKTAEEERRHRHRSWDEDEDEDEEGGREPRPKPRPEPYGPGGGGKGEMFLLKDSKKVVSTQAGEMRVVKGYGGKIVESPLHIGFITMEPRSLFVPQYLDSSLILYIRRGEAKLGFIYDDKLSERKLKNGDVYRIPAGSTFYIVNTGETERLTIICSIDPSEGLGFGTFQSFFIGGGRDPVSVLAGFDPRTLSTAFNVSIGQLREFMTGQDAGPIVYADTTHAPSLWANFLKLKGEERLERLKMVAPNTGSDEPKIEQPKSSWWNIFDSLLGTENKKGEKKDDSRTGSSPDSYNLRDQKPSFKNDYGWSIAVDKHEYKPLKKSGIGLYLVNLAAGSMMAPHVNPMATEYGVVLSGVGTI…

## Sheet: Band C
Family	Member	Database	Accession	Score	Mass	Num. of matches	Num. of significant matches	Num. of sequences	Num. of significant sequences	emPAI	Description
1	1	NCBI_ChenopodiumQuinoa	AAS67036.1	1948	54007	44	42	12	12	1.12	AAS67036.1 11S seed storage globulin [Chenopodium quinoa]
1	2	NCBI_ChenopodiumQuinoa	ABI94736.1	1883	53942	39	38	10	10	0.87	ABI94736.1 11S seed storage globulin B [Chenopodium quinoa]
2	1	NCBI_ChenopodiumQuinoa	XP_021768838.1	1410	52806	40	40	14	14	1.45	XP_021768838.1 11S globulin seed storage protein 2-like [Chenopodium quinoa]
3	1	NCBI_ChenopodiumQuinoa	XP_021752668.1	1021	61191	31	29	16	16	1.42	XP_021752668.1 13S globulin seed storage protein 2-like [Chenopodium quinoa]
4	1	NCBI_ChenopodiumQuinoa	XP_021746146.1	237	62487	8	8	8	8	0.54	XP_021746146.1 vicilin-like seed storage protein At2g28490 [Chenopodium quinoa]
5	1	NCBI_ChenopodiumQuinoa	XP_021762713.1	183	64522	7	6	6	6	0.37	XP_021762713.1 vicilin-like antimicrobial peptides 2-1 [Chenopodium quinoa]
5	2	NCBI_ChenopodiumQuinoa	XP_021764389.1	160	65329	7	6	6	6	0.36	XP_021764389.1 vicilin-like antimicrobial peptides 2-2 [Chenopodium quinoa]

## Sheet: Band D
Family	Member	Database	Accession	Score	Mass	Num. of matches	Num. of significant matches	Num. of sequences	Num. of significant sequences	emPAI	Description
1	1	NCBI_ChenopodiumQuinoa	ABI94736.1	1999	53942	39	39	11	11	0.99	ABI94736.1 11S seed storage globulin B [Chenopodium quinoa]
1	2	NCBI_ChenopodiumQuinoa	AAS67036.1	1891	54007	39	38	12	12	1.12	AAS67036.1 11S seed storage globulin [Chenopodium quinoa]
2	1	NCBI_ChenopodiumQuinoa	XP_021768838.1	622	52806	20	20	14	14	1.45	XP_021768838.1 11S globulin seed storage protein 2-like [Chenopodium quinoa]
3	1	NCBI_ChenopodiumQuinoa	XP_021721911.1	603	52297	13	13	9	9	0.79	XP_021721911.1 13S globulin seed storage protein 1-like [Chenopodium quinoa]	MAFTTTNNNNAILFLVPLCLLVFLITPSFAQLPFLQRRPQQPRGQQWQHDCDIQQLQAAEPTCRLRAEAGVIEVWESNSEQFRCAGVAAVRYVIEPKGLLLPSYTNAPYVTYVTQGRGIQGVIVPGCPETFESPLGSATSRVGQRDQHQRVFRVQEGDVIGSPAGVAQWTYNDGDAPIVSVTLLDLSNPHNQLDLNFRSFYLAGNPQGGQERGPKEVAGKNIFNGFDDDLLADAYNVDTETVRSMKGENDERGSIIRVERDLEILSPEWDDIEEERTRRLNGLEQTLCSLSFKQNIDQPSLADVFTKHGGRINTINGRKLPLLQYLQLSVERGVLYKNALMTPHWNINAHSIIYITRGTGRIQVARENGRLVFDDRVQEGQLLVVPQNFVVVKKAEQEG…
3	2	NCBI_ChenopodiumQuinoa	XP_021752233.1	424	52580	13	12	9	8	0.67	XP_021752233.1 13S globulin seed storage protein 1-like [Chenopodium quinoa]	MAFTTTNNNALLFWVPLCLLVFLISPSLAQLPLLQRQPQQPRGQQWQHDCDIQQLQAAEPTHRLRAEAGVIEVWESNSEQFRCAGVAAVRYVIEPKGLLLPSYTNAPYVTYVTQGRGIQGVIVPGCPETFESPRGSGSDTTREGQRDQHQKVFRVQEGDVIGSPAGVVQWTYNDGDAPIVSVTLLDLSNPNNQLDLNFRSFYLAGDPQGGQERRPKEVAGKNIFNGFDDEMLADAFNVDTETIRSMKAENDERGSIIRVERDLEILSPEWDDTEEERTRRLNGLEQTLCSLIFKQNIDRPSLADVFTKHGGRINTLNGHKLPLLQYLQLSVERGVLYKNALMTPHWNINAHSIIYITRGTGWIQVARENGRLVFDDRVQEGQLLVVPQNFVVVKKAEQE…
4	1	NCBI_ChenopodiumQuinoa	XP_021752668.1	508	61191	15	14	12	12	0.94	XP_021752668.1 13S globulin seed storage protein 2-like [Chenopodium quinoa]
5	1	NCBI_ChenopodiumQuinoa	XP_021762713.1	127	64522	4	4	4	4	0.23	XP_021762713.1 vicilin-like antimicrobial peptides 2-1 [Chenopodium quinoa]
